# Supplementary material for: Protein-truncating and rare missense variants in ATM and CHEK2 and associations with cancer in UK Biobank whole-exome sequence data
Source: PubMed Central journal article supplement (PMC11503094; doi:10.1136/jmg-2024-110127), 2024-08-29
Supplement: jmg-61-11-s001.pdf [file jmg-61-11-s001.pdf]

**Protein-truncating and rare missense variants in *ATM* and *CHEK2* and associations with cancer in UK**

**Biobank whole-exome sequence data**

Toqir K. Mukhtar, Naomi Wilcox, Joe Dennis, Xin Yang, Marc Naven, Nasim Mavaddat, John R. B. Perry, Eugene J.

Gardner, Douglas F. Easton

Supplementary Figures, Supplemental Tables and Supplemental Appendix

## Supplemental Figures

Supplemental Figure 1: Cumulative absolute female breast cancer risks in *ATM* and *CHEK2* protein-truncating/missense variant carriers and the general female population by age<sup>1</sup>.

Supplemental Figure 2: Cumulative absolute prostate cancer risks in *ATM* and *CHEK2* protein-truncating/missense variant carriers and the general male population by age.

Supplemental Figure 3: Cumulative absolute any cancer (other than non melanoma skin cancer) risks for female *ATM* and *CHEK2* protein-truncating/missense variant carriers and the general female population by age<sup>2</sup>.

Supplemental Figure 4: Cumulative absolute any cancer (other than non melanoma skin cancer) risks for male *ATM* and *CHEK2* protein-truncating/missense variant carriers and the general male population by age.

<sup>1</sup>For breast cancer in *ATM* truncating variant carriers, where there was evidence of a decline of risk with age, HRs from the time-dependent model in Supplemental Table 1 were used. In all other cases a constant HR was assumed.

<sup>2</sup>For any cancer in females in *ATM* truncating variant carriers, where there was evidence of a decline of risk with age, HRs from the time-dependent model in Supplemental Table 1 were used. In all other cases a constant HR was assumed.

**Supplemental Figure 1.** Cumulative absolute female breast cancer risks in *ATM* and *CHEK2* protein-truncating/missense variant carriers and the general female population by age.

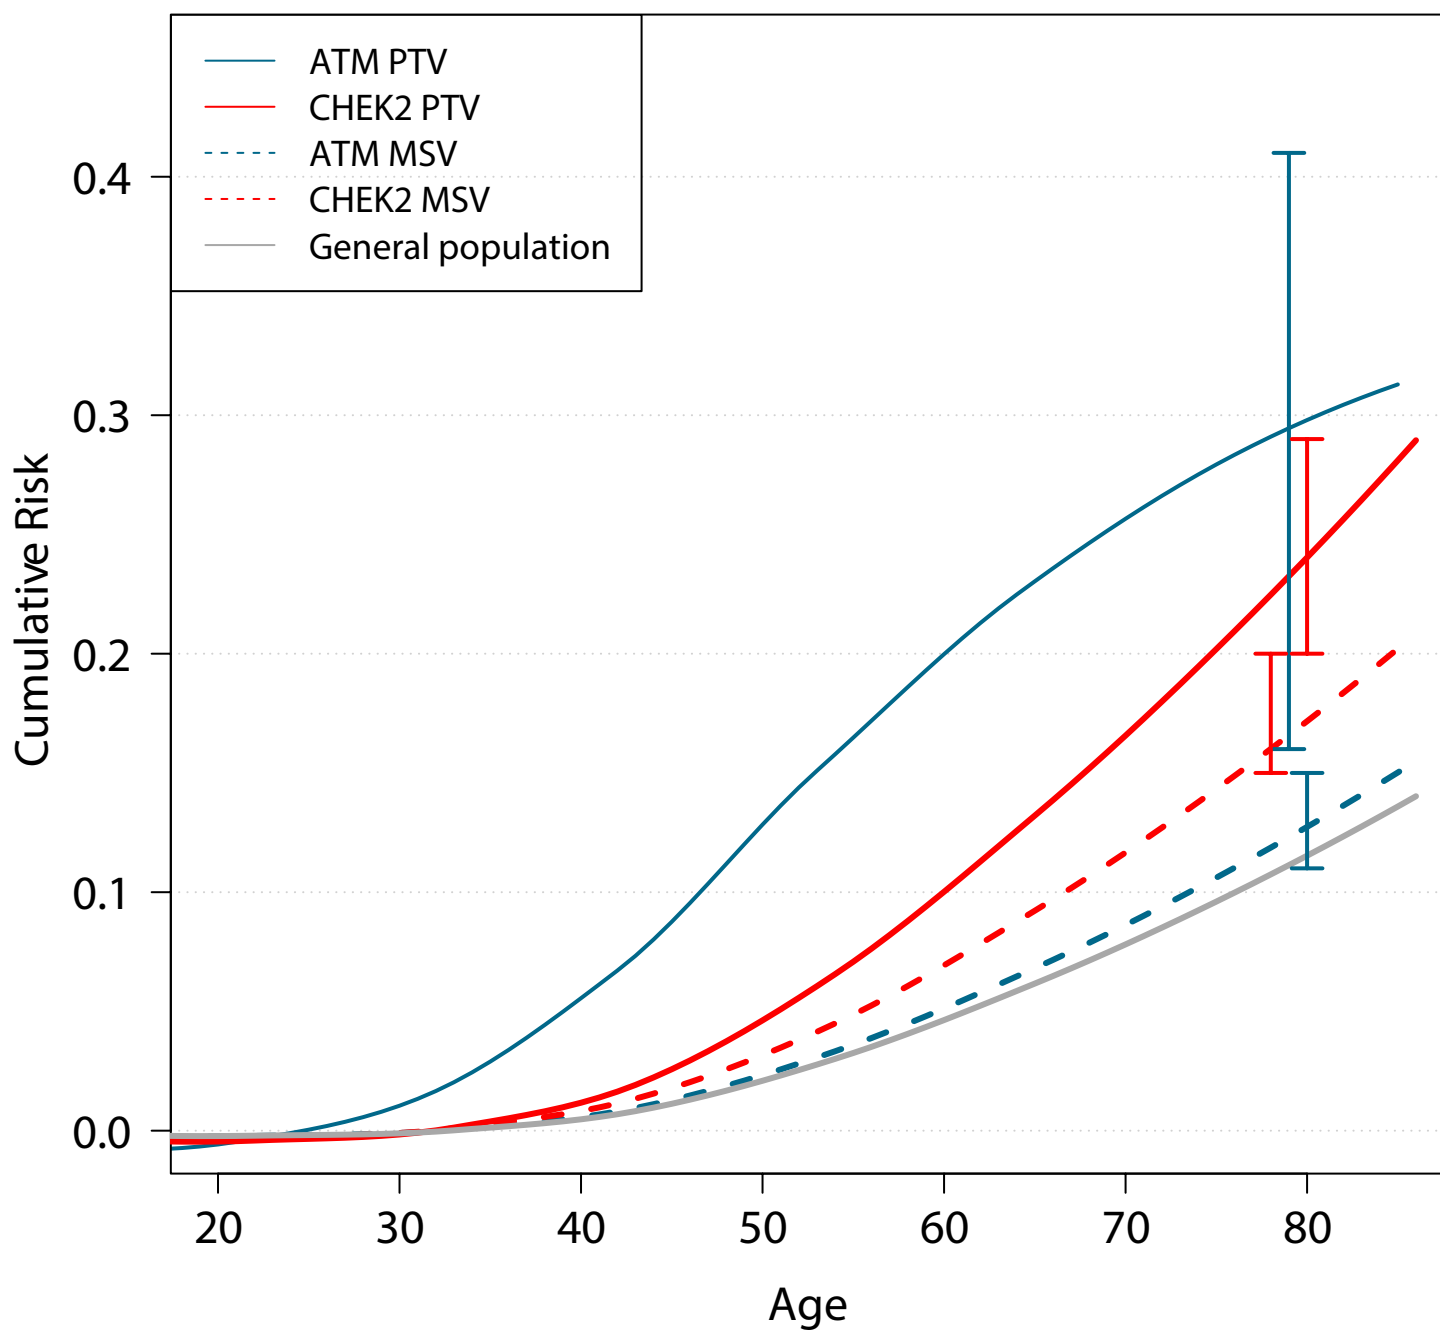

**Supplemental Figure 2.** Cumulative absolute prostate cancer risks in *ATM* and *CHEK2* protein-truncating/missense variant carriers and the general male population by age.

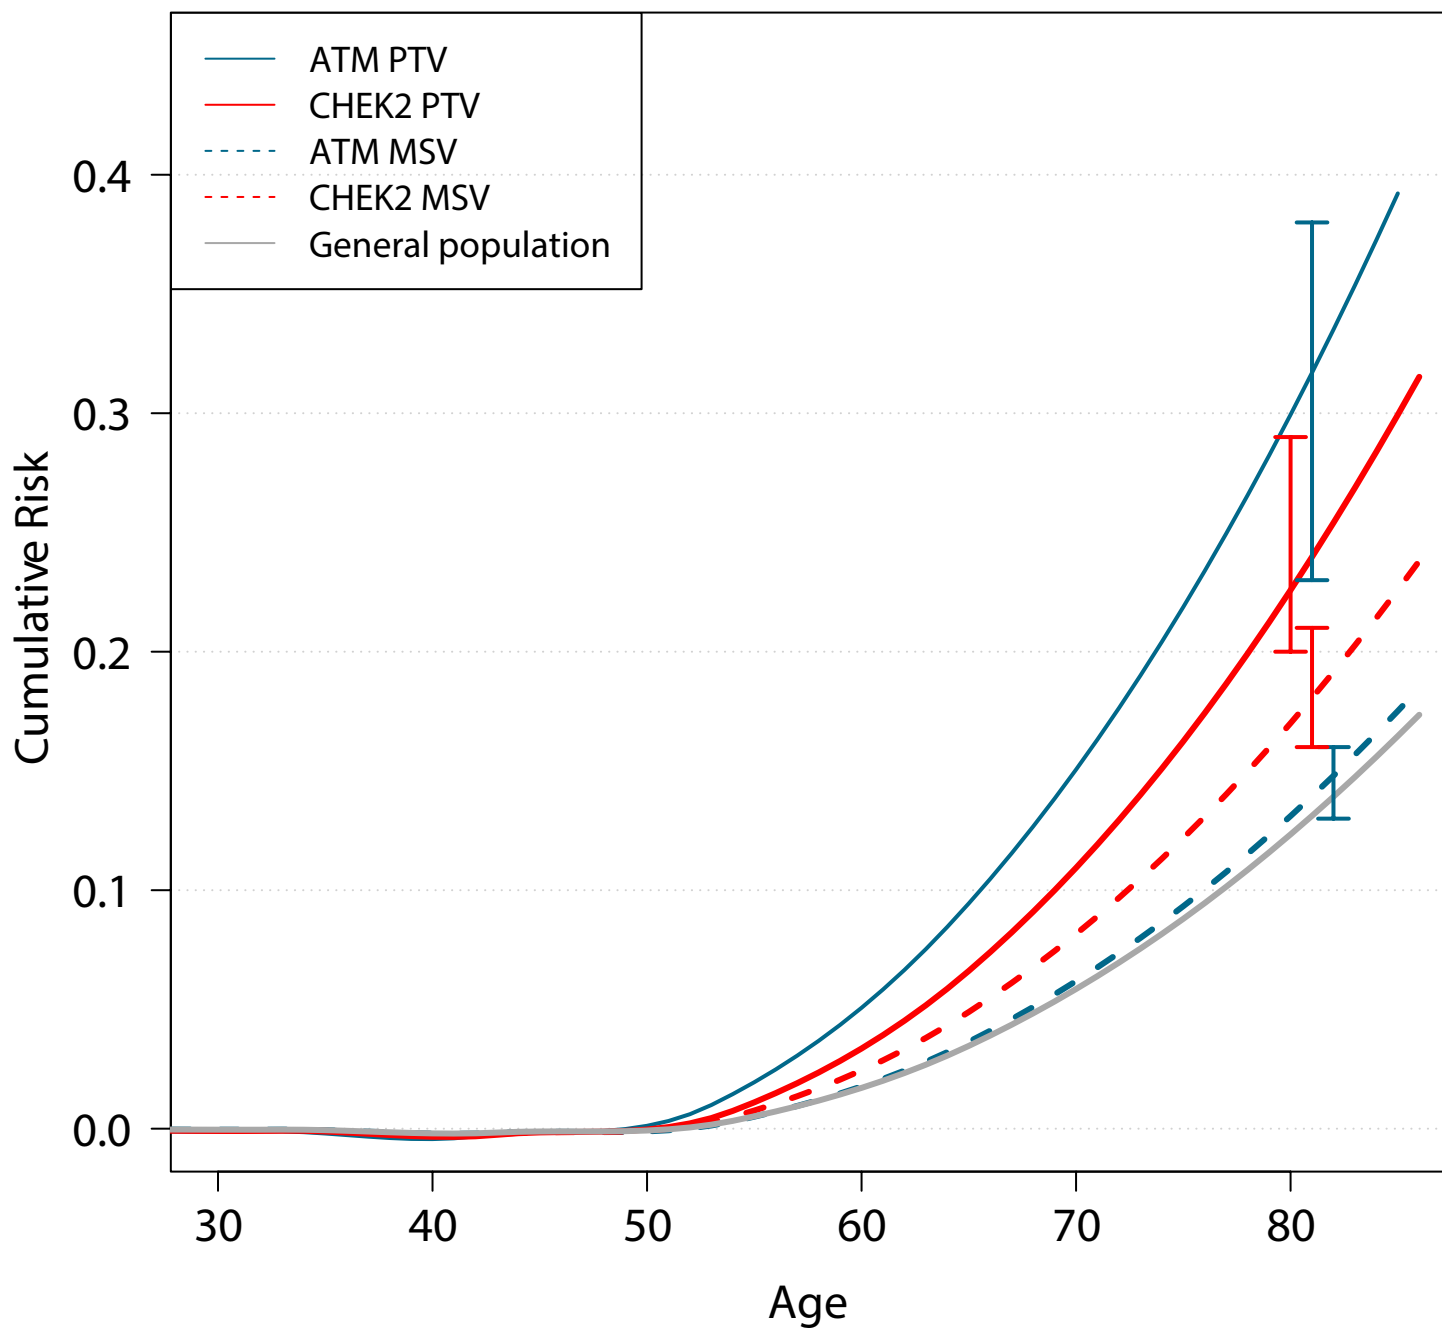

**Supplemental Figure 3.** Cumulative absolute risks of any cancer (other than non-melanoma skin cancer) in female *ATM* and *CHEK2* protein-truncating/missense variant carriers and the general female population by age.

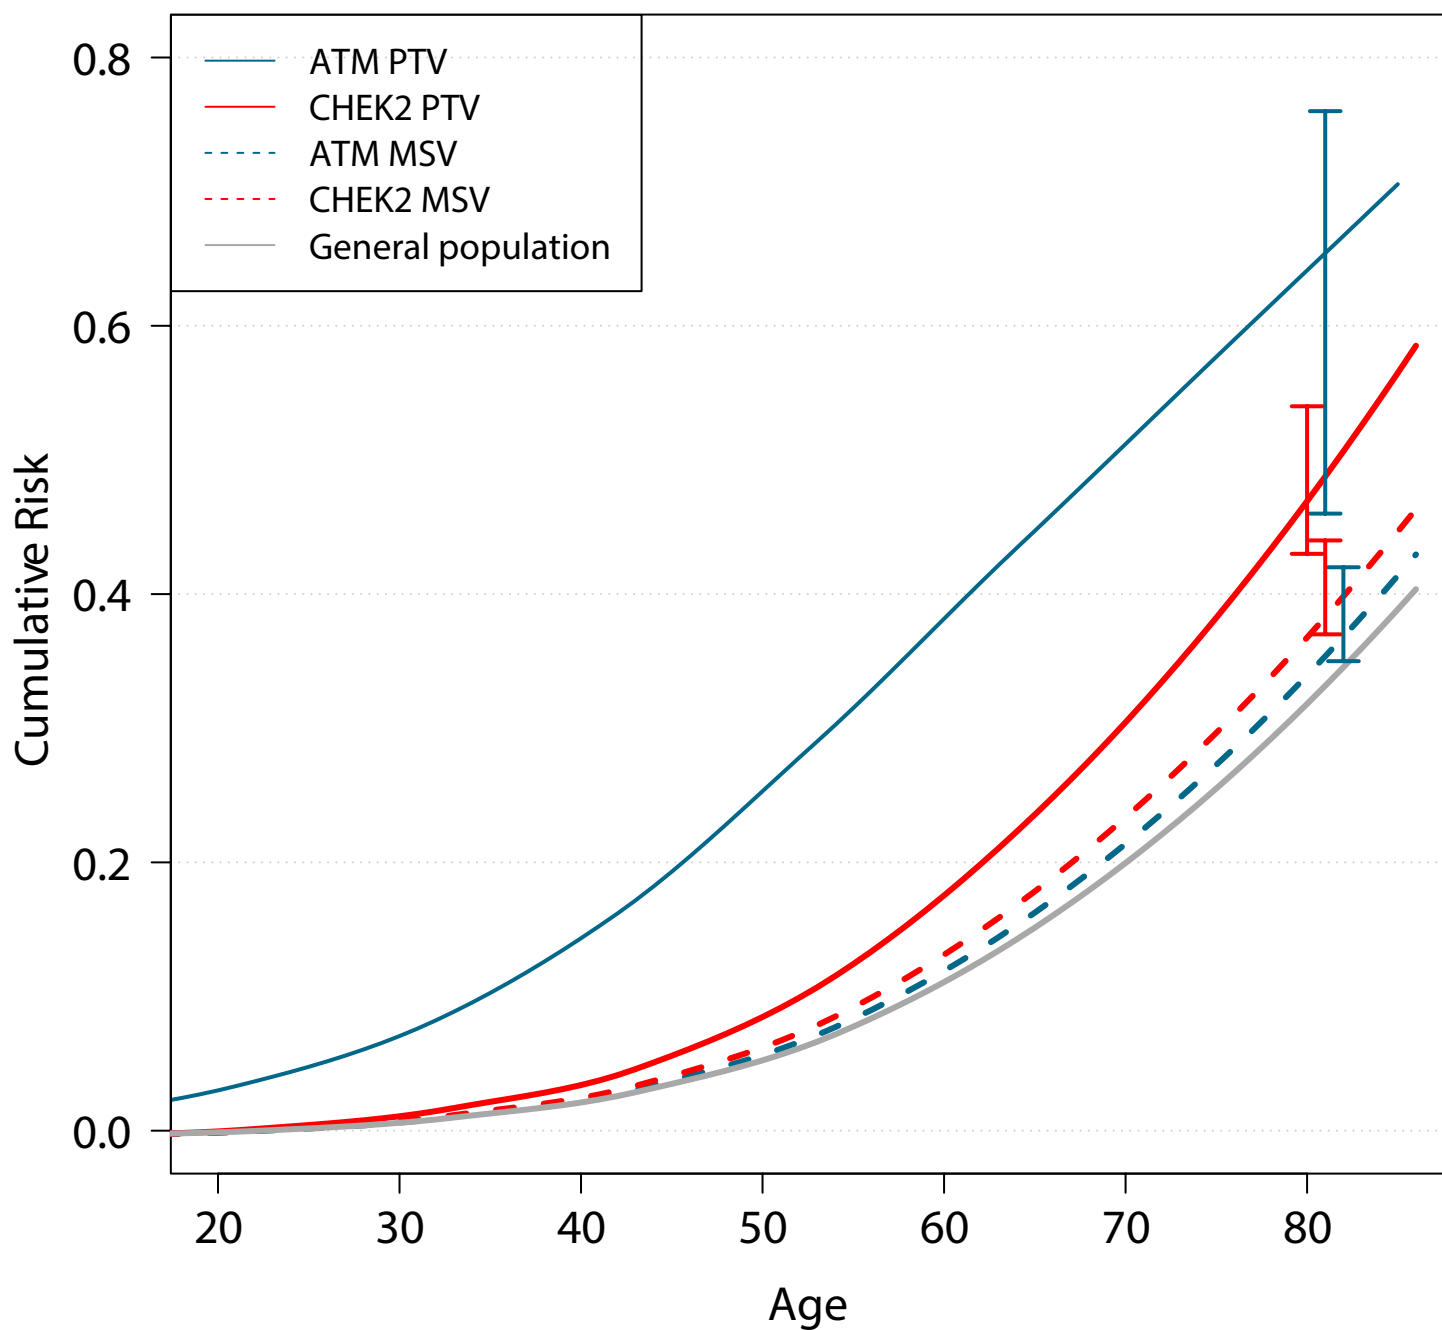

**Supplemental Figure 4.** Cumulative absolute risks of any cancer (other than non-melanoma skin cancer) in male *ATM* and *CHEK2* protein-truncating/missense variant carriers and the general male population by age.

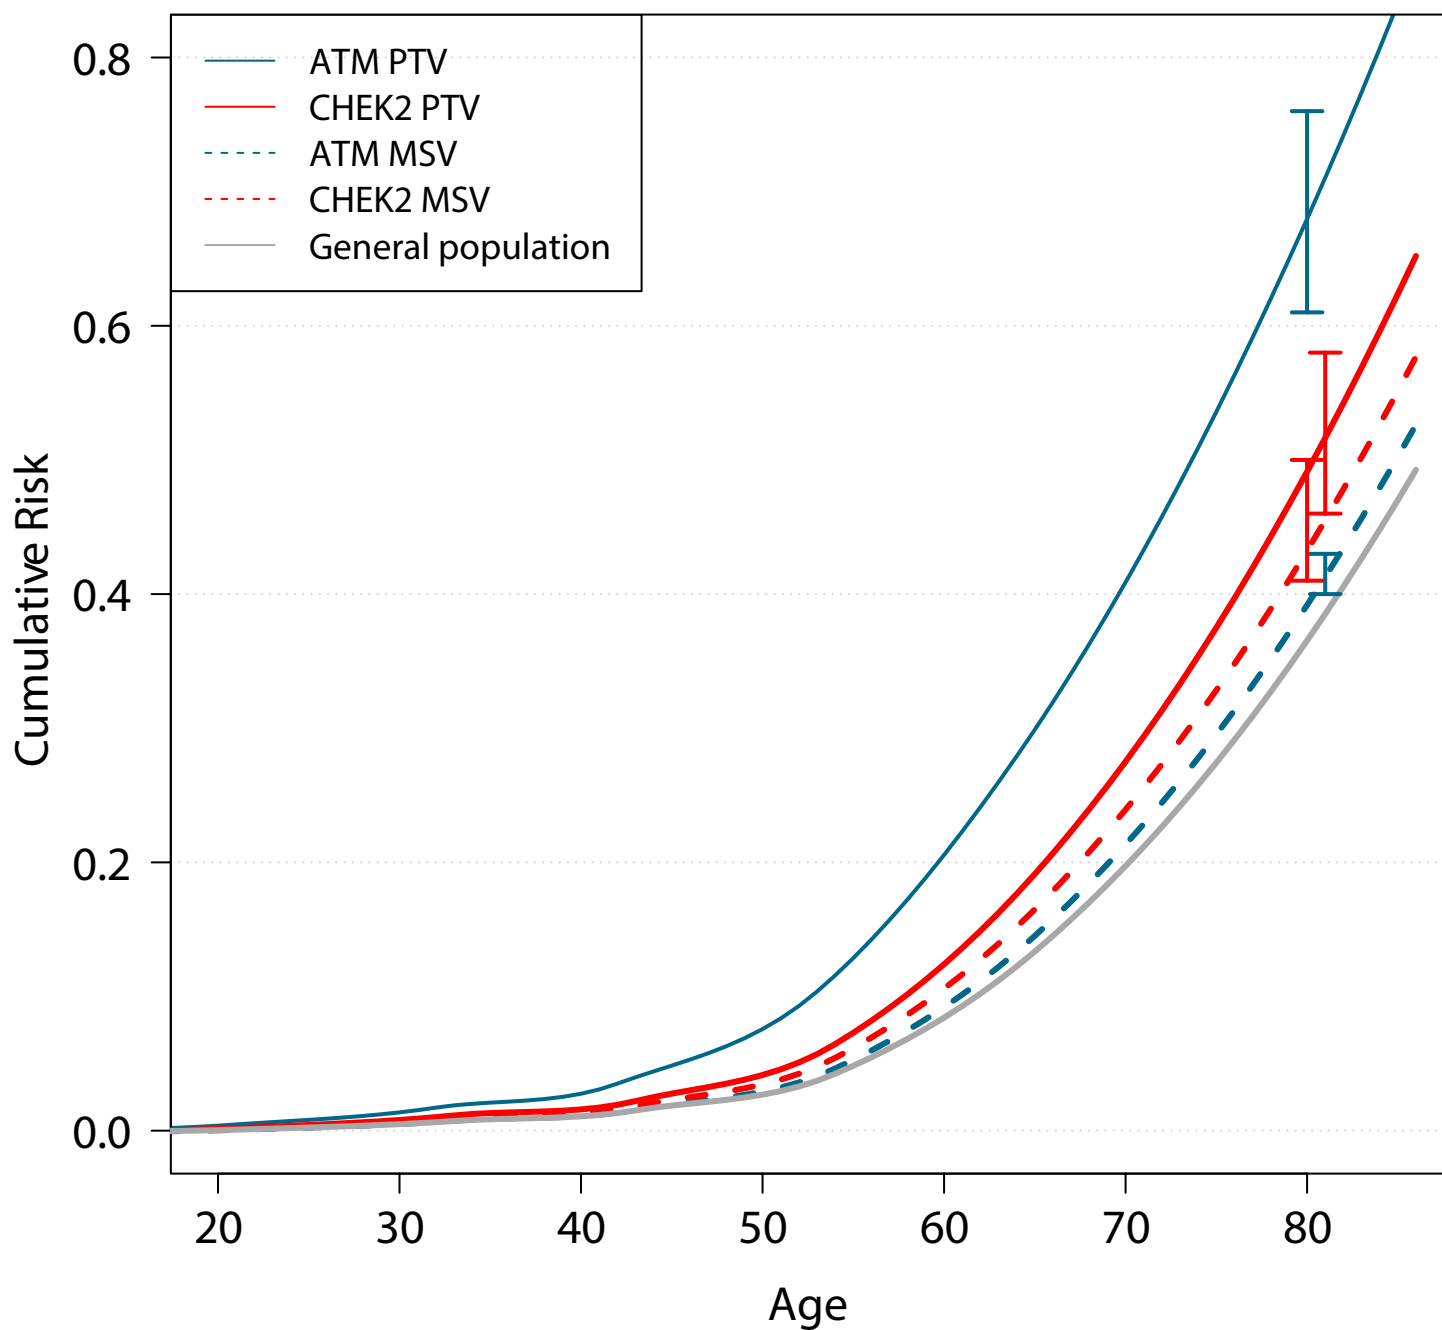

## Supplemental Tables

Supplemental Table 1: Odds ratios, hazard ratios, and pooled estimates for the association of PTVs in *ATM* with cancer by type

Supplemental Table 2: Odds ratios, hazard ratios, and pooled estimates for the association of rMSVs in *ATM* with cancer by type

Supplemental Table 3: Odds ratios, hazard ratios, and pooled estimates for the association of PTVs in *CHEK2* with cancer by type

Supplemental Table 4: Odds ratios, hazard ratios, and pooled estimates for the association of rMSVs in *CHEK2* with cancer by type

Supplemental Table 5: Cox regression analyses for the association of PTVs in *ATM* with cancer by type, using a continuous time-dependent coefficient

Supplemental Table 6: Cox regression analyses for the association of rMSVs in *ATM* with cancer by type using a continuous time-dependent coefficient

Supplemental Table 7: Cox regression analyses for the association of PTVs in *CHEK2* with cancer by type, using a continuous time-dependent coefficient

Supplemental Table 8: Cox regression analyses for the association of rMSVs in *CHEK2* with cancer by type, using a continuous time-dependent coefficient

Supplemental Table 9a: Cox regression analyses for the association of PTVs in *ATM* with cancer by type using a time-dependent coefficient

Supplemental Table 9b: Cox regression analyses for the association of rMSVs in *ATM* with cancer by type using a time-dependent coefficient

Supplemental Table 10a: Cox regression analyses for the association of PTVs in *CHEK2* with cancer by type using a time-dependent coefficient

Supplemental Table 10b: Cox regression analyses for the association of rMSVs in *CHEK2* with cancer by type using a time-dependent coefficient

Supplemental Table 11a: Odds ratios and hazard ratios for the association of rMSVs in *ATM* with pancreatic cancer, by domain and CADD score

Supplemental Table 11b: Odds ratios and hazard ratios for the association of rMSVs in *ATM* with breast cancer, by domain and CADD score

Supplemental Table 11c: Odds ratios and hazard ratios for the association of rMSVs in *ATM* with prostate cancer, by domain and CADD score

Supplemental Table 11d: Odds ratios and hazard ratios for the association of rMSVs in *ATM* with any cancer, by domain and CADD score

Supplemental Table 11e: Odds ratios and hazard ratios for the association of rMSVs in *ATM* with any cancer in females, by domain and CADD score

Supplemental Table 11f: Odds ratios and hazard ratios for the association of rMSVs in *ATM* with any cancer in males, by domain and CADD score

Supplemental Table 12a: Odds ratios and hazard ratios for the association of rMSVs in *CHEK2* with breast cancer by Helix score

Supplemental Table 12b: Odds ratios and hazard ratios for the association of rMSVs in *CHEK2* with prostate cancer by Helix score

Supplemental Table 12c: Odds ratios and hazard ratios for the association of rMSVs in *CHEK2* with pancreatic cancer by Helix score

Supplemental Table 12d: Odds ratios and hazard ratios for the association of rMSVs in *CHEK2* with any cancer in males and females by Helix score

Supplemental Table 12e: Odds ratios and hazard ratios for the association of rMSVs in *CHEK2* with any cancer in females by Helix score

Supplemental Table 12f: Odds ratios and hazard ratios for the association of rMSVs in *CHEK2* with any cancer in males by Helix score



**Supplemental Table 1: Odds ratios, hazard ratios, and pooled estimates for the association of PTVs in ATM with cancer by type**

| Cancer                            | ICD- | Carrier count | Non-carriers | OR (95% CI)              | P-value    | Carrier count | Non-carriers | HR (95% CI)             | P-value    | Pooled estimate (95% CI) | P-value    |
|-----------------------------------|------|---------------|--------------|--------------------------|------------|---------------|--------------|-------------------------|------------|--------------------------|------------|
| Oesophagus                        | C15  | 1             | 113          | 3.67<br>(0.51 to 26.30)  | 0.196      | 6             | 750          | 3.95<br>(1.77 to 8.82)  | 8.10[E-04] | 3.90<br>(1.85 to 8.20)   | 3.43[E-04] |
| Stomach                           | C16  | 1             | 105          | 3.86<br>(0.54 to 27.69)  | 0.179      | 1             | 481          | 1.03<br>(0.15 to 7.36)  | 0.973      | 1.98<br>(0.49 to 7.97)   | 0.336      |
| Colon                             | C18  | 5             | 1050         | 1.91<br>(0.79 to 4.60)   | 0.151      | 13            | 2749         | 2.29<br>(1.33 to 3.95)  | 2.91[E-03] | 2.18<br>(1.37 to 3.48)   | 1.04[E-03] |
| Rectosigmoid junction             | C19  | 2             | 178          | 4.50<br>(1.12 to 18.17)  | 0.035      | 1             | 240          | 2.01<br>(0.28 to 14.34) | 0.486      | 3.43<br>(1.10 to 10.66)  | 0.033      |
| Rectum                            | C20  | 4             | 595          | 2.71<br>(1.01 to 7.27)   | 0.047      | 1             | 1164         | 0.41<br>(0.06 to 2.93)  | 0.376      | 1.86<br>(0.78 to 4.48)   | 0.164      |
| Liver and intrahepatic bile ducts | C22  | 0             | 26           |                          |            | 2             | 444          | 2.27<br>(0.57 to 9.09)  | 0.248      | 2.11<br>(0.53 to 8.42)   |            |
| Pancreas                          | C25  | 2             | 39           | 20.64<br>(4.97 to 85.76) | 3.10[E-05] | 11            | 873          | 6.15<br>(3.39 to 11.14) | 2.18[E-09] | 7.35<br>(4.27 to 12.66)  | 6.53[E-13] |
| Bronchus and lung                 | C34  | 1             | 241          | 1.67<br>(0.23 to 11.89)  | 0.611      | 15            | 2715         | 2.71<br>(1.63 to 4.50)  | 1.21[E-04] | 2.64<br>(1.61 to 4.32)   | 1.18[E-04] |
| Melanoma of skin                  | C43  | 9             | 1490         | 2.39<br>(1.24 to 4.61)   | 9.64[E-03] | 10            | 2167         | 2.17<br>(1.17 to 4.04)  | 0.015      | 2.28<br>(1.44 to 3.59)   | 4.18[E-04] |
| Breast                            | C50  | 35            | 6267         | 2.20<br>(1.56 to 3.10)   | 7.49[E-06] | 33            | 6169         | 2.34<br>(1.66 to 3.30)  | 1.09[E-06] | 2.27<br>(1.77 to 2.91)   | 1.18[E-10] |
| Cervix uteri                      | C53  | 0             | 328          |                          |            | 1             | 85           | 4.96<br>(0.69 to 35.65) | 0.111      | 0.93<br>(0.13 to 6.63)   |            |
| Corpus uteri                      | C54  | 2             | 676          | 1.13<br>(0.28 to 4.54)   | 0.862      | 1             | 1051         | 0.43<br>(0.06 to 3.05)  | 0.399      | 0.82<br>(0.26 to 2.53)   | 0.723      |
| Ovary                             | C56  | 4             | 490          | 3.12<br>(1.16 to 8.37)   | 0.024      | 5             | 681          | 3.27<br>(1.36 to 7.88)  | 8.35[E-03] | 3.20<br>(1.66 to 6.16)   | 5.12[E-04] |
| Prostate                          | C61  | 10            | 2552         | 1.66<br>(0.89 to 3.12)   | 0.114      | 41            | 8124         | 2.56<br>(1.88 to 3.48)  | 1.97[E-09] | 2.35<br>(1.78 to 3.11)   | 2.41[E-09] |
| Testis                            | C62  | 1             | 405          | 1.03<br>(0.15 to 7.37)   | 0.974      | 0             | 73           |                         |            | 0.88<br>(0.12 to 6.28)   |            |
| Kidney, except renal pelvis       | C64  | 2             | 386          | 2.11<br>(0.52 to 8.47)   | 0.294      | 2             | 1001         | 0.97<br>(0.24 to 3.86)  | 0.959      | 1.43<br>(0.53 to 3.82)   | 0.480      |

|                                            |     |    |       |                         |            |     |       |                         |             |                         |            |
|--------------------------------------------|-----|----|-------|-------------------------|------------|-----|-------|-------------------------|-------------|-------------------------|------------|
| Bladder                                    | C67 | 2  | 430   | 1.91<br>(0.48 to 7.68)  | 0.362      | 7   | 780   | 4.54<br>(2.16 to 9.55)  | 6.81[E-05]  | 3.74<br>(1.94 to 7.21)  | 8.30[E-05] |
| Brain                                      | C71 | 1  | 82    | 4.92<br>(0.68 to 35.37) | 0.114      | 1   | 556   | 0.85<br>(0.12 to 6.04)  | 0.871       | 2.03<br>(0.50 to 8.16)  | 0.320      |
| Thyroid                                    | C73 | 1  | 269   | 1.44<br>(0.20 to 10.29) | 0.715      | 1   | 270   | 1.66<br>(0.23 to 11.81) | 0.614       | 1.55<br>(0.39 to 6.21)  | 0.534      |
| Hodgkin's disease                          | C81 | 0  | 183   |                         |            | 1   | 81    | 5.88<br>(0.82 to 42.26) | 0.078       | 1.59<br>(0.22 to 11.27) |            |
| Diffuse non-Hodgkin's lymphoma             | C83 | 1  | 297   | 1.36<br>(0.19 to 9.69)  | 0.760      | 6   | 790   | 3.68<br>(1.65 to 8.22)  | 1.47[E-03]  | 3.18<br>(1.51 to 6.69)  | 2.28[E-03] |
| Multiple myeloma and plasma cell neoplasms | C90 | 0  | 145   |                         |            | 0   | 614   |                         |             |                         |            |
| Lymphoid leukaemia                         | C91 | 3  | 232   | 5.31<br>(1.70 to 16.62) | 4.14[E-03] | 4   | 508   | 3.86<br>(1.44 to 10.31) | 7.20[E-03]  | 4.42<br>(2.11 to 9.29)  | 8.67[E-05] |
| Myeloid leukaemia                          | C92 | 0  | 126   |                         |            | 0   | 361   |                         |             |                         |            |
| Carcinoma in situ of breast                | D05 | 7  | 948   | 2.82<br>(1.33 to 5.96)  | 6.70[E-03] | 9   | 1102  | 3.57<br>(1.85 to 6.88)  | 1.44[E-04]  | 3.22<br>(1.96 to 5.28)  | 4.05[E-06] |
| Any cancer                                 |     | 96 | 18742 | 2.14<br>(1.73 to 2.65)  | 2.54[E-12] | 185 | 37617 | 2.34<br>(2.03 to 2.71)  | < 2[E-16]   | 2.28<br>(2.03 to 2.56)  | 2.98[E-44] |
| Any cancer in females                      |     | 61 | 11774 | 2.10<br>(1.60 to 2.75)  | 6.63[E-08] | 92  | 17261 | 2.32<br>(1.89 to 2.85)  | 8.03 [E-16] | 2.23<br>(1.88 to 2.64)  | 1.86[E-20] |
| Any cancer in females minus breast         |     | 22 | 4686  | 1.82<br>(1.18 to 2.79)  | 6.34[E-03] | 50  | 10400 | 2.16<br>(1.64 to 2.85)  | 5.39[E-08]  | 2.06<br>(1.63 to 2.59)  | 1.03[E-09] |
| Any cancer in males                        |     | 35 | 6968  | 2.22<br>(1.57 to 3.14)  | 7.47[E-06] | 93  | 19996 | 2.37<br>(1.93 to 2.90)  | 2.00[E-16]  | 2.33<br>(1.96 to 2.77)  | 3.81[E-22] |
| Any cancer in males minus prostate         |     | 25 | 4416  | 2.47<br>(1.64 to 3.71)  | 1.32[E-05] | 52  | 11872 | 2.23<br>(1.70 to 2.93)  | 7.30[E-09]  | 2.30<br>(1.83 to 2.88)  | 9.90[E-13] |

**Supplemental Table 2: Odds ratios, hazard ratios, and pooled estimates for the association of rMSVs in ATM with cancer by type**

| Cancer                            | ICD-10 | Carrier count | Non-carriers | OR (95% CI)            | P-value    | Carrier count | Non-carriers | HR (95% CI)            | P-value    | Pooled (95% CI)        | P-value    |
|-----------------------------------|--------|---------------|--------------|------------------------|------------|---------------|--------------|------------------------|------------|------------------------|------------|
| Oesophagus                        | C15    | 2             | 112          | 0.50<br>(0.12 to 2.03) | 0.333      | 36            | 720          | 1.43<br>(1.03 to 2.00) | 0.035      | 1.35<br>(0.98 to 1.87) | 0.067      |
| Stomach                           | C16    | 6             | 100          | 1.67<br>(0.73 to 3.82) | 0.220      | 24            | 458          | 1.51<br>(1.00 to 2.27) | 0.050      | 1.54<br>(1.07 to 2.23) | 0.022      |
| Colon                             | C18    | 41            | 1014         | 1.13<br>(0.83 to 1.54) | 0.449      | 85            | 2677         | 0.90<br>(0.73 to 1.12) | 0.359      | 0.97<br>(0.81 to 1.16) | 0.746      |
| Rectosigmoid junction             | C19    | 8             | 172          | 1.28<br>(0.63 to 2.61) | 0.492      | 6             | 235          | 0.73<br>(0.32 to 1.64) | 0.445      | 1.00<br>(0.59 to 1.70) | 0.995      |
| Rectum                            | C20    | 27            | 572          | 1.32<br>(0.90 to 1.94) | 0.162      | 36            | 1129         | 0.91<br>(0.65 to 1.26) | 0.559      | 1.06<br>(0.82 to 1.37) | 0.647      |
| Liver and intrahepatic bile ducts | C22    | 2             | 24           | 2.35<br>(0.56 to 9.97) | 0.245      | 19            | 427          | 1.27<br>(0.80 to 2.01) | 0.313      | 1.35<br>(0.86 to 2.11) | 0.190      |
| Pancreas                          | C25    | 3             | 38           | 2.17<br>(0.67 to 7.03) | 0.197      | 46            | 838          | 1.56<br>(1.16 to 2.10) | 3.19[E-03] | 1.60<br>(1.20 to 2.13) | 1.27[E-03] |
| Bronchus and lung                 | C34    | 9             | 233          | 1.08<br>(0.56 to 2.11) | 0.815      | 108           | 2622         | 1.18<br>(0.97 to 1.43) | 0.092      | 1.18<br>(0.98 to 1.42) | 0.090      |
| Melanoma of skin                  | C43    | 54            | 1445         | 1.04<br>(0.79 to 1.36) | 0.803      | 82            | 2095         | 1.11<br>(0.89 to 1.38) | 0.355      | 1.08<br>(0.91 to 1.28) | 0.373      |
| Breast                            | C50    | 229           | 6073         | 1.05<br>(0.91 to 1.20) | 0.517      | 236           | 5966         | 1.11<br>(0.97 to 1.26) | 0.128      | 1.07<br>(0.97 to 1.18) | 0.157      |
| Cervix uteri                      | C53    | 12            | 316          | 1.06<br>(0.59 to 1.89) | 0.847      | 2             | 84           | 0.68<br>(0.17 to 2.75) | 0.584      | 1.00<br>(0.59 to 1.69) | 0.992      |
| Corpus uteri                      | C54    | 24            | 654          | 1.01<br>(0.67 to 1.52) | 0.958      | 36            | 1016         | 0.99<br>(0.71 to 1.39) | 0.973      | 1.00<br>(0.77 to 1.29) | 0.987      |
| Ovary                             | C56    | 8             | 486          | 0.46<br>(0.23 to 0.92) | 0.028      | 27            | 659          | 1.15<br>(0.79 to 1.69) | 0.469      | 0.92<br>(0.66 to 1.30) | 0.650      |
| Prostate                          | C61    | 118           | 2444         | 1.35<br>(1.12 to 1.63) | 1.70[E-03] | 298           | 7867         | 1.08<br>(0.96 to 1.21) | 0.190      | 1.15<br>(1.04 to 1.27) | 7.21[E-03] |
| Testis                            | C62    | 10            | 396          | 0.70<br>(0.37 to 1.31) | 0.265      | 4             | 69           | 1.62<br>(0.59 to 4.43) | 0.351      | 0.89<br>(0.52 to 1.51) | 0.651      |
| Kidney, except renal pelvis       | C64    | 15            | 373          | 1.12<br>(0.67 to 1.87) | 0.673      | 38            | 965          | 1.11<br>(0.81 to 1.54) | 0.513      | 1.12<br>(0.85 to 1.48) | 0.440      |

|                                                      |     |     |       |                        |            |      |       |                        |            |                        |            |
|------------------------------------------------------|-----|-----|-------|------------------------|------------|------|-------|------------------------|------------|------------------------|------------|
| Bladder                                              | C67 | 18  | 414   | 1.21<br>(0.75 to 1.93) | 0.439      | 33   | 754   | 1.25<br>(0.88 to 1.77) | 0.214      | 1.23<br>(0.93 to 1.64) | 0.146      |
| Brain                                                | C71 | 1   | 82    | 0.34<br>(0.05 to 2.43) | 0.282      | 17   | 540   | 0.89<br>(0.55 to 1.43) | 0.619      | 0.84<br>(0.52 to 1.35) | 0.470      |
| Thyroid                                              | C73 | 10  | 260   | 1.08<br>(0.57 to 2.03) | 0.819      | 9    | 262   | 0.97<br>(0.50 to 1.88) | 0.921      | 1.02<br>(0.65 to 1.62) | 0.921      |
| Hodgkin's disease                                    | C81 | 12  | 171   | 1.94<br>(1.08 to 3.49) | 0.027      | 3    | 79    | 1.08<br>(0.34 to 3.42) | 0.896      | 1.72<br>(1.02 to 2.90) | 0.043      |
| Diffuse non-Hodgkin's lymphoma                       | C83 | 12  | 286   | 1.16<br>(0.65 to 2.08) | 0.606      | 29   | 767   | 1.07<br>(0.74 to 1.55) | 0.712      | 1.10<br>(0.80 to 1.50) | 0.563      |
| Multiple myeloma and malignant plasma cell neoplasms | C90 | 3   | 142   | 0.58<br>(0.19 to 1.82) | 0.351      | 23   | 591   | 1.11<br>(0.73 to 1.68) | 0.632      | 1.03<br>(0.70 to 1.51) | 0.896      |
| Lymphoid leukaemia                                   | C91 | 7   | 228   | 0.85<br>(0.40 to 1.81) | 0.679      | 22   | 490   | 1.28<br>(0.83 to 1.96) | 0.263      | 1.15<br>(0.79 to 1.67) | 0.464      |
| Myeloid leukaemia                                    | C92 | 2   | 124   | 0.44<br>(0.11 to 1.79) | 0.253      | 15   | 346   | 1.23<br>(0.73 to 2.06) | 0.433      | 1.09<br>(0.68 to 1.77) | 0.714      |
| Carcinoma in situ of the breast                      | D05 | 37  | 918   | 1.12<br>(0.80 to 1.55) | 0.518      | 45   | 1066  | 1.18<br>(0.87 to 1.59) | 0.285      | 1.15<br>(0.92 to 1.43) | 0.220      |
| Any cancer                                           |     | 701 | 18137 | 1.08<br>(1.00 to 1.16) | 0.063      | 1409 | 36393 | 1.10<br>(1.04 to 1.16) | 6.41[E-04] | 1.09<br>(1.04 to 1.14) | 5.61[E-04] |
| Any cancer in females                                |     | 417 | 11418 | 1.01<br>(0.91 to 1.12) | 0.823      | 664  | 17049 | 1.09<br>(1.01 to 1.18) | 0.024      | 1.06<br>(1.00 to 1.13) | 0.060      |
| Any cancer in females minus breast                   |     | 161 | 4547  | 0.98<br>(0.84 to 1.15) | 0.797      | 385  | 10065 | 1.08<br>(0.97 to 1.19) | 0.152      | 1.05<br>(0.96 to 1.14) | 0.292      |
| Any cancer in males                                  |     | 284 | 6719  | 1.19<br>(1.05 to 1.34) | 6.15[E-03] | 745  | 19344 | 1.10<br>(1.02 to 1.19) | 9.49[E-03] | 1.13<br>(1.06 to 1.21) | 2.60[E-04] |
| Any cancer in males minus prostate                   |     | 166 | 4275  | 1.08<br>(0.93 to 1.27) | 0.314      | 447  | 11477 | 1.12<br>(1.02 to 1.23) | 0.023      | 1.11<br>(1.02 to 1.20) | 0.017      |

**Supplemental Table 3: Odds ratios, hazard ratios, and pooled estimates for the association of PTVs in CHEK2 with cancer by type**

| Cancer                            | ICD-10 | Carrier count | Non-carriers | OR (95% CI)             | P-value     | Carrier count | Non-carriers | HR (95% CI)            | P-value    | Pooled estimate (95% CI) | P-value     |
|-----------------------------------|--------|---------------|--------------|-------------------------|-------------|---------------|--------------|------------------------|------------|--------------------------|-------------|
| Oesophagus                        | C15    | 2             | 112          | 3.17<br>(0.78 to 12.85) | 0.107       | 7             | 749          | 1.89<br>(0.90 to 3.99) | 0.093      | 2.13<br>(1.10 to 4.10)   | 0.025       |
| Stomach                           | C16    | 0             | 106          |                         |             | 3             | 479          | 1.28<br>(0.41 to 3.98) | 0.671      | 1.01<br>(0.33 to 3.13)   |             |
| Colon                             | C18    | 9             | 1046         | 1.54<br>(0.80 to 2.97)  | 0.201       | 9             | 2753         | 0.65<br>(0.34 to 1.26) | 0.203      | 0.99<br>(0.62 to 1.57)   | 0.957       |
| Rectosigmoid junction             | C19    | 3             | 177          | 3.00<br>(0.96 to 9.42)  | 0.060       | 0             | 241          |                        |            | 1.31<br>(0.42 to 4.06)   |             |
| Rectum                            | C20    | 2             | 597          | 0.59<br>(0.15 to 2.35)  | 0.451       | 5             | 1160         | 0.86<br>(0.36 to 2.06) | 0.731      | 0.77<br>(0.37 to 1.62)   | 0.491       |
| Liver and intrahepatic bile ducts | C22    | 0             | 26           |                         |             | 2             | 444          | 0.89<br>(0.22 to 3.59) | 0.874      | 0.84<br>(0.21 to 3.35)   |             |
| Pancreas                          | C25    | 0             | 41           |                         |             | 6             | 878          | 1.36<br>(0.61 to 3.04) | 0.452      | 1.29<br>(0.58 to 2.87)   |             |
| Bronchus and lung                 | C34    | 0             | 242          |                         |             | 14            | 2716         | 1.08<br>(0.64 to 1.83) | 0.772      | 0.98<br>(0.58 to 1.65)   |             |
| Melanoma of skin                  | C43    | 11            | 1488         | 1.29<br>(0.71 to 2.35)  | 0.396       | 17            | 2160         | 1.55<br>(0.96 to 2.49) | 0.074      | 1.45<br>(1.00 to 2.09)   | 0.049       |
| Breast                            | C50    | 87            | 6215         | 2.65<br>(2.12 to 3.30)  | <2[E-16]    | 67            | 6135         | 2.23<br>(1.76 to 2.84) | 6.29[E-11] | 2.44<br>(2.08 to 2.86)   | 3.61[E-28]  |
| Cervix Uteri                      | C53    | 0             | 328          |                         |             | 0             | 86           |                        |            |                          |             |
| Corpus uteri                      | C54    | 2             | 676          | 0.52<br>(0.13 to 2.08)  | 0.354       | 7             | 1045         | 1.39<br>(0.66 to 2.93) | 0.383      | 1.12<br>(0.58 to 2.15)   | 0.744       |
| Ovary                             | C56    | 6             | 488          | 2.18<br>(0.97 to 4.89)  | 0.059       | 8             | 678          | 2.47<br>(1.23 to 4.95) | 0.011      | 2.33<br>(1.37 to 3.97)   | 1.73[E-03]  |
| Prostate                          | C61    | 27            | 2535         | 1.83<br>(1.25 to 2.69)  | 2.09 [E-03] | 84            | 8081         | 1.96<br>(1.58 to 2.43) | 8.54[E-10] | 1.92<br>(1.59 to 2.32)   | 1.18 [E-11] |
| Testis                            | C62    | 5             | 401          | 2.17<br>(0.89 to 5.25)  | 0.087       | 0             | 73           |                        |            | 1.82<br>(0.76 to 4.38)   |             |
| Kidney, except renal pelvis       | C64    | 5             | 383          | 2.29<br>(0.95 to 5.54)  | 0.067       | 8             | 995          | 1.58<br>(0.79 to 3.17) | 0.197      | 1.83<br>(1.06 to 3.18)   | 0.032       |

|                                               |     |     |       |                         |            |     |       |                         |            |                        |            |
|-----------------------------------------------|-----|-----|-------|-------------------------|------------|-----|-------|-------------------------|------------|------------------------|------------|
| Bladder                                       | C67 | 3   | 429   | 1.17<br>(0.38 to 3.66)  | 0.784      | 5   | 782   | 1.25<br>(0.52 to 3.00)  | 0.624      | 1.22<br>(0.61 to 2.45) | 0.579      |
| Brain                                         | C71 | 2   | 81    | 4.28<br>(1.05 to 17.45) | 0.043      | 0   | 557   |                         |            | 0.61<br>(0.15 to 2.43) |            |
| Thyroid                                       | C73 | 3   | 267   | 2.07<br>(0.66 to 6.47)  | 0.211      | 1   | 270   | 0.76<br>(0.11 to 5.41)  | 0.783      | 1.61<br>(0.60 to 4.30) | 0.343      |
| Hodgkin's disease                             | C81 | 4   | 179   | 3.88<br>(1.44 to 10.48) | 7.39[E-03] | 2   | 80    | 5.11<br>(1.25 to 20.82) | 0.023      | 4.26<br>(1.89 to 9.64) | 4.93[E-04] |
| Diffuse non-Hodgkin's lymphoma                | C83 | 4   | 294   | 2.38<br>(0.89 to 6.39)  | 0.086      | 7   | 789   | 1.77<br>(0.84 to 3.73)  | 0.132      | 1.97<br>(1.09 to 3.57) | 0.025      |
| Multiple myeloma and malignant cell neoplasms | C90 | 1   | 144   | 1.21<br>(0.17 to 8.62)  | 0.853      | 3   | 611   | 0.97<br>(0.31 to 3.02)  | 0.961      | 1.03<br>(0.38 to 2.74) | 0.960      |
| Lymphoid leukaemia                            | C91 | 0   | 235   |                         |            | 7   | 505   | 2.73<br>(1.29 to 5.75)  | 8.49[E-03] | 1.78<br>(0.85 to 3.74) |            |
| Myeloid leukaemia                             | C92 | 3   | 123   | 4.07<br>(1.29 to 12.82) | 0.017      | 4   | 357   | 2.17<br>(0.81 to 5.81)  | 0.125      | 2.81<br>(1.33 to 5.94) | 6.75[E-03] |
| Carcinoma in situ of breast                   | D05 | 11  | 944   | 2.10<br>(1.16 to 3.82)  | 0.015      | 11  | 1100  | 2.01<br>(1.11 to 3.63)  | 0.022      | 2.05<br>(1.35 to 3.13) | 8.48[E-04] |
| Any cancer                                    |     | 192 | 18646 | 1.91<br>(1.64 to 2.21)  | <2[E-16]   | 297 | 37505 | 1.57<br>(1.40 to 1.76)  | 8.58[E-15] | 1.68<br>(1.53 to 1.85) | 3.44[E-27] |
| Any cancer in females                         |     | 122 | 11713 | 1.99<br>(1.64 to 2.40)  | 1.55[E-12] | 141 | 17572 | 1.67<br>(1.41 to 1.97)  | 1.59[E-09] | 1.81<br>(1.58 to 2.06) | 1.07[E-18] |
| Any cancer in females minus breast            |     | 26  | 4682  | 1.00<br>(0.67 to 1.47)  | 0.984      | 63  | 10387 | 1.28<br>(1.00 to 1.63)  | 0.054      | 1.18<br>(0.96 to 1.46) | 0.124      |
| Any cancer in males                           |     | 70  | 6933  | 1.78<br>(1.40 to 2.28)  | 3.57[E-06] | 156 | 19933 | 1.50<br>(1.28 to 1.75)  | 5.05[E-07] | 1.57<br>(1.37 to 1.79) | 4.21[E-11] |
| Any cancer in males minus prostate            |     | 43  | 4398  | 1.71<br>(1.26 to 2.33)  | 6.17[E-04] | 72  | 11852 | 1.18<br>(0.93 to 1.48)  | 0.174      | 1.35<br>(1.12 to 1.62) | 1.99[E-03] |

**Supplemental Table 4: Odds ratios, hazard ratios, and pooled estimates for the association of rMSVs in CHEK2 with cancer by type**

| Cancer                            | ICD-10 | Carrier count | Non-carrier | OR (95% CI)             | P-value    | Carrier count | Non-carriers | HR (95% CI)            | P-value    | Pooled estimate (95% CI) | P-value     |
|-----------------------------------|--------|---------------|-------------|-------------------------|------------|---------------|--------------|------------------------|------------|--------------------------|-------------|
| Oesophagus                        | C15    | 0             | 114         |                         |            | 6             | 750          | 0.70<br>(0.31 to 1.56) | 0.385      | 0.61<br>(0.27 to 1.35)   |             |
| Stomach                           | C16    | 0             | 106         |                         |            | 3             | 479          | 0.55<br>(0.18 to 1.72) | 0.305      | 0.45<br>(0.15 to 1.40)   |             |
| Colon                             | C18    | 15            | 1040        | 1.19<br>(0.71 to 1.98)  | 0.515      | 35            | 2727         | 1.11<br>(0.80 to 1.55) | 0.529      | 1.14<br>(0.86 to 1.50)   | 0.369       |
| Rectosigmoid junction             | C19    | 1             | 179         | 0.46<br>(0.06 to 3.25)  | 0.433      | 2             | 239          | 0.73<br>(0.18 to 2.93) | 0.657      | 0.62<br>(0.20 to 1.93)   | 0.410       |
| Rectum                            | C20    | 10            | 589         | 1.40<br>(0.75 to 2.61)  | 0.297      | 11            | 1154         | 0.82<br>(0.45 to 1.49) | 0.513      | 1.06<br>(0.58 to 1.92)   | 0.855       |
| Liver and intrahepatic bile ducts | C22    | 0             | 26          |                         |            | 5             | 441          | 1.01<br>(0.42 to 2.43) | 0.986      | 0.95<br>(0.40 to 2.28)   |             |
| Pancreas                          | C25    | 1             | 40          | 2.03<br>(0.28 to 14.81) | 0.484      | 10            | 874          | 0.99<br>(0.53 to 1.85) | 0.979      | 1.06<br>(0.58 to 1.92)   | 0.855       |
| Bronchus and lung                 | C34    | 3             | 239         | 1.05<br>(0.34 to 3.27)  | 0.939      | 26            | 2704         | 0.84<br>(0.57 to 1.24) | 0.388      | 0.86<br>(0.60 to 1.25)   | 0.438       |
| Melanoma of skin                  | C43    | 27            | 1472        | 1.48<br>(1.01 to 2.17)  | 0.044      | 30            | 2147         | 1.19<br>(0.83 to 1.71) | 0.343      | 1.32<br>(1.01 to 1.71)   | 0.041       |
| Breast                            | C50    | 112           | 6190        | 1.46<br>(1.20 to 1.77)  | 1.16[E-04] | 113           | 6089         | 1.54<br>(1.28 to 1.85) | 6.30[E-06] | 1.50<br>(1.31 to 1.72)   | 1.02[E-08]  |
| Cervix uteri                      | C53    | 5             | 323         | 1.24<br>(0.51 to 3.01)  | 0.629      | 0             | 86           |                        |            | 1.01<br>(0.42 to 2.44)   |             |
| Corpus uteri                      | C54    | 8             | 670         | 0.93<br>(0.46 to 1.88)  | 0.847      | 14            | 1038         | 1.12<br>(0.66 to 1.89) | 0.682      | 1.05<br>(0.69 to 1.60)   | 0.834       |
| Ovary                             | C56    | 8             | 486         | 1.31<br>(0.65 to 2.63)  | 0.454      | 8             | 678          | 0.98<br>(0.49 to 1.97) | 0.959      | 1.13<br>(0.69 to 1.87)   | 0.623       |
| Prostate                          | C61    | 41            | 2521        | 1.37<br>(1.00 to 1.87)  | 0.051      | 130           | 8035         | 1.42<br>(1.19 to 1.69) | 7.28[E-05] | 1.41<br>(1.21 to 1.64)   | 1.43 [E-05] |
| Testis                            | C62    | 7             | 399         | 1.48<br>(0.70 to 3.14)  | 0.302      | 1             | 72           | 1.16<br>(0.16 to 8.36) | 0.882      | 1.43<br>(0.71 to 2.88)   | 0.311       |
| Kidney, except renal pelvis       | C64    | 3             | 385         | 0.64<br>(0.21 to 1.99)  | 0.438      | 14            | 989          | 1.21<br>(0.71 to 2.05) | 0.481      | 1.08<br>(0.67 to 1.74)   | 0.756       |

|                                                      |     |     |       |                        |            |     |       |                        |            |                        |            |
|------------------------------------------------------|-----|-----|-------|------------------------|------------|-----|-------|------------------------|------------|------------------------|------------|
| Bladder                                              | C67 | 10  | 422   | 1.96<br>(1.05 to 3.68) | 0.036      | 10  | 777   | 1.12<br>(0.60 to 2.09) | 0.718      | 1.48<br>(0.95 to 2.31) | 0.081      |
| Brain                                                | C71 | 0   | 83    |                        |            | 4   | 553   | 0.61<br>(0.23 to 1.64) | 0.329      | 0.53<br>(0.20 to 1.42) |            |
| Thyroid                                              | C73 | 5   | 265   | 1.52<br>(0.63 to 3.70) | 0.351      | 3   | 268   | 0.93<br>(0.30 to 2.91) | 0.906      | 1.27<br>(0.63 to 2.54) | 0.507      |
| Hodgkin's disease                                    | C81 | 3   | 180   | 1.35<br>(0.43 to 4.23) | 0.605      | 1   | 81    | 1.06<br>(0.15 to 7.62) | 0.953      | 1.27<br>(0.48 to 3.41) | 0.633      |
| Diffuse non-Hodgkin's lymphoma                       | C83 | 1   | 297   | 0.28<br>(0.04 to 1.96) | 0.199      | 9   | 787   | 0.99<br>(0.51 to 1.91) | 0.974      | 0.87<br>(0.46 to 1.63) | 0.658      |
| Multiple myeloma and malignant plasma cell neoplasms | C90 | 2   | 143   | 1.14<br>(0.28 to 4.59) | 0.858      | 14  | 600   | 1.99<br>(1.17 to 3.39) | 0.011      | 1.86<br>(1.13 to 3.05) | 0.014      |
| Lymphoid leukaemia                                   | C91 | 5   | 230   | 1.80<br>(0.74 to 4.37) | 0.195      | 14  | 498   | 2.41<br>(1.41 to 4.09) | 1.21[E-03] | 2.23<br>(1.42 to 3.52) | 5.22[E-04] |
| Myeloid leukaemia                                    | C92 | 0   | 126   |                        |            | 8   | 353   | 1.95<br>(0.97 to 3.93) | 0.062      | 1.40<br>(0.70 to 2.81) |            |
| Carcinoma in situ of breast                          | D05 | 20  | 935   | 1.69<br>(1.09 to 2.64) | 0.020      | 19  | 1092  | 1.42<br>(0.90 to 2.24) | 0.127      | 1.55<br>(1.13 to 2.14) | 6.82[E-03] |
| Any cancer                                           |     | 304 | 18534 | 1.35<br>(1.20 to 1.52) | 5.01[E-07] | 535 | 37267 | 1.23<br>(1.13 to 1.34) | 2.69[E-06] | 1.26<br>(1.18 to 1.35) | 4.10[E-12] |
| Any cancer in females                                |     | 200 | 11635 | 1.40<br>(1.21 to 1.62) | 7.75[E-06] | 253 | 17460 | 1.20<br>(1.06 to 1.36) | 3.83[E-03] | 1.26<br>(1.15 to 1.39) | 1.09[E-06] |
| Any cancer in females minus breast                   |     | 69  | 4639  | 1.18<br>(0.93 to 1.51) | 0.174      | 122 | 10328 | 0.98<br>(0.82 to 1.17) | 0.839      | 1.05<br>(0.91 to 1.21) | 0.501      |
| Any cancer in males                                  |     | 104 | 6899  | 1.28<br>(1.05 to 1.56) | 0.016      | 282 | 19807 | 1.26<br>(1.12 to 1.42) | 1.20[E-04] | 1.27<br>(1.14 to 1.40) | 4.80[E-06] |
| Any cancer in males minus prostate                   |     | 63  | 4378  | 1.22<br>(0.94 to 1.56) | 0.132      | 152 | 11772 | 1.15<br>(0.98 to 1.35) | 0.091      | 1.17<br>(1.02 to 1.34) | 0.022      |



**Supplemental Table 5: Cox regression analyses for the association of PTVs in ATM with cancer by type, using a continuous time-dependent coefficient**

|                            | HR (95% CI)          | P-value    |
|----------------------------|----------------------|------------|
| <b>Breast</b>              |                      |            |
| variant                    | 4.08 (2.49 to 6.68)  | 2.25[E-08] |
| variant x age <sup>1</sup> | 0.95 (0.92 to 0.99)  | 0.012      |
| <b>Prostate</b>            |                      |            |
| variant                    | 2.25 (0.82 to 6.23)  | 0.118      |
| variant x age <sup>1</sup> | 1.01 (0.96 to 1.06)  | 0.796      |
| <b>Pancreatic</b>          |                      |            |
| variant                    | 4.30 (0.72 to 25.83) | 0.110      |
| variant x age <sup>1</sup> | 1.02 (0.93 to 1.11)  | 0.672      |
| <b>Any cancer females</b>  |                      |            |
| variant                    | 3.49 (2.43 to 5.01)  | 1.14[E-11] |
| variant x age <sup>1</sup> | 0.97 (0.95 to 0.99)  | 0.013      |
| <b>Any cancer males</b>    |                      |            |
| variant                    | 2.85 (1.64 to 4.95)  | 2.11[E-04] |
| variant x age <sup>1</sup> | 0.99 (0.96 to 1.02)  | 0.487      |

<sup>1</sup>Fit using a model of the form  $\text{coxph}(\text{Surv}(\text{time}, \text{event}) \sim \text{variant} + \text{tt}(\text{variant}) + \dots, \text{tt} = \text{function}(x, t, \dots) \times (t - 50))$ . The main effect is thus the estimated HR associated with carrying a variant at age 50 years. The interaction term is the estimated relative change in the HR associated with carrying a variant, per year.

**Supplemental Table 6: Cox regression analyses for the association of rMSVs in ATM with cancer by type using a continuous time-dependent coefficient**

|                            | HR (95% CI)         | P-value |
|----------------------------|---------------------|---------|
| <b>Breast</b>              |                     |         |
| variant                    | 1.17 (0.91 to 1.50) | 0.211   |
| variant x age <sup>1</sup> | 1.00 (0.98 to 1.01) | 0.593   |
| <b>Prostate</b>            |                     |         |
| variant                    | 1.16 (0.80 to 1.68) | 0.443   |
| variant x age <sup>1</sup> | 1.00 (0.98 to 1.02) | 0.705   |
| <b>Pancreatic</b>          |                     |         |
| variant                    | 1.40 (0.59 to 3.34) | 0.451   |
| variant x age <sup>1</sup> | 1.01 (0.96 to 1.05) | 0.788   |
| <b>Any cancer females</b>  |                     |         |
| variant                    | 1.19 (1.01 to 1.41) | 0.036   |
| variant x age <sup>1</sup> | 0.99 (0.99 to 1.00) | 0.249   |
| <b>Any cancer males</b>    |                     |         |
| variant                    | 1.06 (0.86 to 1.31) | 0.602   |
| variant x age <sup>1</sup> | 1.00 (0.99 to 1.01) | 0.688   |

<sup>1</sup>Fit using a model of the form  $\text{coxph}(\text{Surv}(\text{time}, \text{event}) \sim \text{variant} + \text{tt}(\text{variant}) + \dots, \text{tt} = \text{function}(x, t, \dots) \times (t - 50))$ . The main effect is thus the estimated HR associated with carrying a variant at age 50 years. The interaction term is the estimated relative change in the HR associated with carrying a variant, per year.

**Supplemental Table 7: Cox regression analyses for the association of PTVs in CHEK2 with cancer by type, using a continuous time-dependent coefficient**

|                            | HR (95% CI)               | P-value    |
|----------------------------|---------------------------|------------|
| <b>Breast</b>              |                           |            |
| variant                    | 2.41 (1.55 to 3.74)       | 9.42[E-05] |
| variant x age <sup>1</sup> | 1.00 (0.97 to 1.02)       | 0.725      |
| <b>Prostate</b>            |                           |            |
| variant                    | 3.14 (1.66 to 5.95)       | 4.41[E-04] |
| variant x age <sup>1</sup> | 0.97 (0.94 to 1.01)       | 0.135      |
| <b>Pancreatic</b>          |                           |            |
| variant                    | 0.05 (7.90[E-04] to 2.50) | 0.130      |
| variant x age <sup>1</sup> | 1.17 (0.99 to 1.39)       | 0.059      |
| <b>Any cancer females</b>  |                           |            |
| variant                    | 1.93 (1.38 to 2.70)       | 1.12[E-04] |
| variant x age <sup>1</sup> | 0.99 (0.97 to 1.01)       | 0.326      |
| <b>Any cancer males</b>    |                           |            |
| variant                    | 1.83 (1.20 to 2.79)       | 0.005      |
| variant x age <sup>1</sup> | 0.99 (0.97 to 1.01)       | 0.332      |

<sup>1</sup>Fit using a model of the form  $\text{coxph}(\text{Surv}(\text{time}, \text{event}) \sim \text{variant} + \text{tt}(\text{variant}) + \dots, \text{tt} = \text{function}(x, t, \dots) \times (t - 50))$ . The main effect is thus the estimated HR associated with carrying a variant at age 50 years. The interaction term is the estimated relative change in the HR associated with carrying a variant, per year.

**Supplemental Table 8: Cox regression analyses for the association of rMSVs in CHEK2 with cancer by type, using a continuous time-dependent coefficient**

|                            | HR (95% CI)         | P-value    |
|----------------------------|---------------------|------------|
| <b>Breast</b>              |                     |            |
| variant                    | 1.72 (1.22 to 2.44) | 2.21[E-03] |
| variant x age <sup>1</sup> | 0.99 (0.97 to 1.01) | 0.444      |
| <b>Prostate</b>            |                     |            |
| variant                    | 1.57 (0.90 to 2.73) | 0.113      |
| variant x age <sup>1</sup> | 1.00 (0.97 to 1.02) | 0.716      |
| <b>Pancreatic</b>          |                     |            |
| variant                    | 1.06 (0.19 to 6.11) | 0.946      |
| variant x age <sup>1</sup> | 1.00 (0.91 to 1.09) | 0.934      |
| <b>Any cancer females</b>  |                     |            |
| variant                    | 1.22 (0.93 to 1.60) | 0.146      |
| variant x age <sup>1</sup> | 1.00 (0.98 to 1.02) | 0.887      |
| <b>Any cancer males</b>    |                     |            |
| variant                    | 1.28 (0.92 to 1.79) | 0.145      |
| variant x age <sup>1</sup> | 1.00 (0.98 to 1.02) | 0.914      |

<sup>1</sup>Fit using a model of the form  $\text{coxph}(\text{Surv}(\text{time}, \text{event}) \sim \text{variant} + \text{tt}(\text{variant}) + \dots, \text{tt} = \text{function}(x, t, \dots) \times (t-50))$ . The main effect is thus the estimated HR associated with carrying a variant at age 50 years. The interaction term is the estimated relative change in the HR associated with carrying a variant, per year

**Supplemental Table 9a: Cox regression analyses for the association of PTVs in ATM with cancer by type using a time-dependent coefficient**

|           | All cancers         |            | Breast              |             | Prostate             |            | Pancreas             |            |
|-----------|---------------------|------------|---------------------|-------------|----------------------|------------|----------------------|------------|
| Age group | HR (95% CI)         | P-value    | HR (95% CI)         | P-value     | HR (95% CI)          | P-value    | HR (95% CI)          | P-value    |
| <50       | 4.76 (2.47 to 9.19) | 3.31[E-06] | 3.92 (2.16 to 7.10) | 6.64[E-06]  | 1.98 (0.28 to 14.12) | 0.495      | 9.15 (1.26 to 66.39) | 0.029      |
| 50-59     | 3.28 (2.41 to 4.48) | 6.95[E-14] | 3.13 (2.02 to 4.87) | 3.62 [E-07] | 2.56 (1.37 to 4.76)  | 3.06[E-03] | 6.24 (2.00 to 19.50) | 1.64[E-03] |
| 60-69     | 2.04 (1.60 to 2.60) | 1.05[E-08] | 1.52 (0.88 to 2.62) | 0.133       | 2.54 (1.82 to 3.54)  | 3.86[E-08] | 4.91 (2.33 to 10.34) | 2.82[E-05] |
| 70-79     | 2.20 (1.74 to 2.78) | 5.02[E-11] | 1.69 (0.81 to 3.56) | 0.164       | 2.89 (1.88 to 4.43)  | 1.27[E-06] | 6.48 (2.90 to 14.50) | 5.43[E-06] |

**Supplemental Table 9b: Cox regression analyses for the association of rMSVs in ATM with cancer by type using a time-dependent coefficient**

|           | All cancers         |            | Breast              |         | Prostate            |         | Pancreas            |            |
|-----------|---------------------|------------|---------------------|---------|---------------------|---------|---------------------|------------|
| Age group | HR (95% CI)         | P-value    | HR (95% CI)         | P-value | HR (95% CI)         | P-value | HR (95% CI)         | P-value    |
| <50       | 1.41 (1.01 to 1.99) | 0.046      | 1.30 (0.97 to 1.75) | 0.079   | 1.65 (0.94 to 2.88) | 0.081   | 0.63 (0.09 to 4.58) | 0.649      |
| 50-59     | 1.03 (0.89 to 1.19) | 0.720      | 1.06 (0.86 to 1.30) | 0.577   | 0.97 (0.75 to 1.25) | 0.790   | 1.09 (0.54 to 2.21) | 0.813      |
| 60-69     | 1.13 (1.04 to 1.23) | 4.22[E-03] | 1.05 (0.90 to 1.24) | 0.528   | 1.08 (0.95 to 1.22) | 0.246   | 1.62 (1.16 to 2.25) | 4.57[E-03] |
| 70-79     | 1.07 (0.99 to 1.17) | 0.104      | 1.07 (0.84 to 1.37) | 0.575   | 1.06 (0.90 to 1.25) | 0.516   | 1.52 (1.01 to 2.29) | 0.046      |

**Supplemental Table 10a: Cox regression analyses for the association of PTVs in CHEK2 with cancer by type using a time-dependent coefficient**

| Age group | All cancers         |            | Breast              |            | Prostate            |             | Pancreatic          |         |
|-----------|---------------------|------------|---------------------|------------|---------------------|-------------|---------------------|---------|
|           | HR (95% CI)         | P-value    | HR (95% CI)         | P-value    | HR (95% CI)         | P-value     | HR (95% CI)         | P-value |
| <50       | 1.69 (0.80 to 3.55) | 0.170      | 1.97 (1.09 to 3.56) | 0.026      | 3.07 (1.14 to 8.24) | 0.026       | 0 (-) <sup>a</sup>  |         |
| 50-59     | 1.61 (1.20 to 2.16) | 1.71[E-03] | 2.20 (1.52 to 3.19) | 3.34[E-05] | 2.13 (1.38 to 3.27) | 5.92[E-04]  | 0 (-) <sup>a</sup>  |         |
| 60-69     | 1.75 (1.48 to 2.07) | 9.33[E-11] | 2.47 (1.86 to 3.29) | 4.59[E-10] | 1.99 (1.58 to 2.51) | 6.22[E-09]  | 1.15 (0.43 to 3.08) | 0.779   |
| 70-79     | 1.39 (1.15 to 1.69) | 6.91[E-04] | 1.79 (1.08 to 2.98) | 0.025      | 1.73 (1.24 to 2.40) | 1.10 [E-03] | 2.23 (0.92 to 5.37) | 0.075   |

<sup>a</sup> no carriers

**Supplemental Table 10b: Cox regression analyses for the association of rMSVs in CHEK2 with cancer by type using a time-dependent coefficient**

| Age group | All cancers         |            | Breast              |            | Prostate            |            | Pancreatic           |         |
|-----------|---------------------|------------|---------------------|------------|---------------------|------------|----------------------|---------|
|           | HR (95% CI)         | P-value    | HR (95% CI)         | P-value    | HR (95% CI)         | P-value    | HR (95% CI)          | P-value |
| <50       | 1.02 (0.53 to 1.97) | 0.951      | 1.46 (0.92 to 2.33) | 0.109      | 0.70 (0.18 to 2.82) | 0.618      | 1.84 (0.25 to 13.35) | 0.547   |
| 50-59     | 1.33 (1.07 to 1.66) | 0.011      | 1.83 (1.40 to 2.39) | 9.41[E-06] | 1.47 (1.03 to 2.10) | 0.033      | 1.21 (0.39 to 3.79)  | 0.742   |
| 60-69     | 1.22 (1.06 to 1.39) | 4.56[E-03] | 1.53 (1.21 to 1.92) | 2.90[E-04] | 1.37 (1.13 to 1.66) | 1.29[E-03] | 0.99 (0.50 to 1.99)  | 0.985   |
| 70-79     | 1.22 (1.07 to 1.39) | 3.49[E-03] | 1.18 (0.80 to 1.74) | 0.400      | 1.34 (1.04 to 1.74) | 0.023      | 1.13 (0.51 to 2.53)  | 0.768   |

**Supplemental Table 11a: Odds ratios and hazard ratios for the association of rMSVs in ATM with pancreatic cancer, by domain and CADD score**

| Domain                                                             | Carrier count | Non-carriers | OR (95% CI)          | P-value | Carrier count | Non-carriers | HR (95% CI)         | P-value | Pooled estimate (95% CI) | P-value |
|--------------------------------------------------------------------|---------------|--------------|----------------------|---------|---------------|--------------|---------------------|---------|--------------------------|---------|
| Variant outside FAT and PIK                                        | 2             | 39           | 2.02 (0.49 to 8.38)  | 0.332   | 32            | 852          | 1.53 (1.08 to 2.18) | 0.018   | 1.56 (1.11 to 2.20)      | 0.011   |
| Variant inside FAT or PIK<br>CADD score quintiles 1-4 <sup>1</sup> | 1             | 40           | 3.01 (0.41 to 21.94) | 0.276   | 10            | 874          | 1.43 (0.77 to 2.66) | 0.264   | 1.53 (0.84 to 2.79)      | 0.161   |
| Variant inside FAT or PIK<br>CADD score quintile 5 <sup>2</sup>    | 0             | 41           | 0                    |         | 5             | 879          | 2.24 (0.93 to 5.39) | 0.072   | 0.15 (0.06 to 0.35)      |         |

<sup>1</sup>≤3.74

<sup>2</sup>>3.74

**Supplemental Table 11b: Odds ratios and hazard ratios for the association of rMSVs in ATM with breast cancer, by domain and CADD score**

| Domain                                                             | Carrier count | Non-carriers | OR (95% CI)         | P-value    | Carrier count | Non-carriers | HR (95% CI)         | P-value | Pooled estimate (95% CI) | P-value    |
|--------------------------------------------------------------------|---------------|--------------|---------------------|------------|---------------|--------------|---------------------|---------|--------------------------|------------|
| Variant outside FAT and PIK                                        | 159           | 6116         | 1.03 (0.88 to 1.21) | 0.710      | 155           | 6001         | 1.03 (0.88 to 1.21) | 0.697   | 1.03 (0.92 to 1.15)      | 0.596      |
| Variant inside FAT or PIK<br>CADD score quintiles 1-4 <sup>1</sup> | 45            | 6230         | 0.88 (0.66 to 1.19) | 0.417      | 62            | 6094         | 1.25 (0.98 to 1.61) | 0.078   | 1.08 (0.89 to 1.31)      | 0.416      |
| Variant inside FAT or PIK<br>CADD score quintile 5 <sup>2</sup>    | 30            | 6245         | 1.85 (1.28 to 2.68) | 1.13[E-03] | 17            | 6139         | 1.11 (0.69 to 1.78) | 0.678   | 1.52 (1.14 to 2.04)      | 4.85[E-03] |

<sup>1</sup>≤3.74

<sup>2</sup>>3.74

**Supplemental Table 11c: Odds ratios and hazard ratios for the association of rMSVs in ATM with prostate cancer, by domain and CADD score**

| Domain                                                                    | Carrier count | Non-carriers | OR (95% CI)         | P-value    | Carrier count | Non-carriers | HR (95% CI)         | P-value | Pooled estimate (95% CI) | P-value    |
|---------------------------------------------------------------------------|---------------|--------------|---------------------|------------|---------------|--------------|---------------------|---------|--------------------------|------------|
| Variant outside FAT and PIK                                               | 77            | 2485         | 1.23 (0.98 to 1.55) | 0.073      | 203           | 7962         | 1.05 (0.92 to 1.21) | 0.480   | 1.10 (0.97 to 1.23)      | 0.134      |
| Variant inside FAT or PIK domain<br>CADD score quintiles 1-4 <sup>1</sup> | 23            | 2539         | 1.14 (0.75 to 1.72) | 0.550      | 76            | 8089         | 1.16 (0.92 to 1.45) | 0.208   | 1.16 (0.94 to 1.42)      | 0.164      |
| Variant inside FAT or PIK domain<br>CADD score quintile 5 <sup>2</sup>    | 20            | 2542         | 2.99 (1.91 to 4.69) | 1.89[E-06] | 21            | 8144         | 0.98 (0.64 to 1.50) | 0.924   | 1.67 (1.23 to 2.29)      | 1.20[E-03] |

<sup>1</sup>≤3.74

<sup>2</sup>>3.74

**Supplemental Table 11d: Odds ratios and hazard ratios for the association of rMSVs in ATM with any cancer, by domain and CADD score**

| Domain                                                                    | Carrier count | Non-carriers | OR (95% CI)         | P-value    | Carrier count | Non-carriers | HR (95% CI)         | P-value    | Pooled estimate (95% CI) | P-value    |
|---------------------------------------------------------------------------|---------------|--------------|---------------------|------------|---------------|--------------|---------------------|------------|--------------------------|------------|
| Variant outside FAT and PIK                                               | 508           | 18330        | 1.11 (1.01 to 1.21) | 0.030      | 971           | 36831        | 1.07 (1.01 to 1.14) | 0.035      | 1.08 (1.03 to 1.14)      | 2.45[E-03] |
| Variant inside FAT or PIK domain<br>CADD score quintiles 1-4 <sup>1</sup> | 131           | 18707        | 0.86 (0.72 to 1.02) | 0.089      | 334           | 37468        | 1.11 (1.00 to 1.23) | 0.063      | 1.02 (0.93 to 1.13)      | 0.644      |
| Variant inside FAT or PIK domain<br>CADD score quintile 5 <sup>2</sup>    | 76            | 18762        | 1.56 (1.23 to 1.97) | 2.16[E-04] | 122           | 37680        | 1.27 (1.06 to 1.52) | 8.54[E-03] | 1.37 (1.19 to 1.58)      | 1.17[E-05] |

<sup>1</sup>≤3.74

<sup>2</sup>>3.74



**Supplemental Table 11e: Odds ratios and hazard ratios for the association of rMSVs in ATM with any cancer in females, by domain and CADD score**

| Domain                                                                           | Carrier count | Non-carriers | OR (95% CI)         | P-value | Carrier count | Non-carriers | HR (95% CI)         | P-value | Pooled estimate (95% CI) | P-value    |
|----------------------------------------------------------------------------------|---------------|--------------|---------------------|---------|---------------|--------------|---------------------|---------|--------------------------|------------|
| <b>Variant outside FAT and PIK</b>                                               | 298           | 11537        | 1.03 (0.91 to 1.16) | 0.682   | 451           | 17262        | 1.05 (0.96 to 1.15) | 0.321   | 1.04 (0.97 to 1.12)      | 0.277      |
| <b>Variant inside FAT or PIK domain<br/>CADD score quintiles 1-4<sup>1</sup></b> | 84            | 11751        | 0.87 (0.70 to 1.09) | 0.216   | 160           | 17553        | 1.13 (0.97 to 1.32) | 0.126   | 1.03 (0.91 to 1.17)      | 0.642      |
| <b>Variant inside FAT or PIK domain<br/>CADD score quintile 5<sup>2</sup></b>    | 45            | 11790        | 1.47 (1.08 to 2.00) | 0.013   | 60            | 17653        | 1.35 (1.05 to 1.74) | 0.021   | 1.40 (1.15 to 1.71)      | 8.74[E-04] |

<sup>1</sup>≤3.74

<sup>2</sup>>3.74

**Supplemental Table 11f: Odds ratios and hazard ratios for the association of rMSVs in ATM with any cancer in males, by domain and CADD score**

| Domain                                                                           | Carrier count | Non-carriers | OR (95% CI)         | P-value     | Carrier count | Non-carriers | HR (95% CI)         | P-value | Pooled estimate (95% CI) | P-value    |
|----------------------------------------------------------------------------------|---------------|--------------|---------------------|-------------|---------------|--------------|---------------------|---------|--------------------------|------------|
| <b>Variant outside FAT and PIK</b>                                               | 210           | 6793         | 1.24 (1.08 to 1.43) | 2.79 [E-03] | 520           | 19569        | 1.10 (1.00 to 1.20) | 0.041   | 1.13 (1.06 to 1.21)      | 4.43[E-04] |
| <b>Variant inside FAT or PIK domain<br/>CADD score quintiles 1-4<sup>1</sup></b> | 47            | 6956         | 0.84 (0.63 to 1.12) | 0.239       | 174           | 19915        | 1.08 (0.93 to 1.26) | 0.290   | 1.02 (0.89 to 1.17)      | 0.751      |
| <b>Variant inside FAT or PIK domain<br/>CADD score quintile 5<sup>2</sup></b>    | 31            | 6972         | 1.70 (1.18 to 2.45) | 4.45[E-03]  | 62            | 20027        | 1.20 (0.94 to 1.54) | 0.151   | 1.34 (1.09 to 1.65)      | 6.57[E-03] |

<sup>1</sup>≤3.74

<sup>2</sup>>3.74

**Supplemental Table 12a: Odds ratios and hazard ratios for the association of rMSVs in CHEK2 with breast cancer by Helix score**

| Category               | Carrier count | Non-carriers | OR (95% CI)         | P-value    | Carrier count | Non-carriers | HR (95% CI)         | P-value    | Pooled estimate (95% CI) | P-value    |
|------------------------|---------------|--------------|---------------------|------------|---------------|--------------|---------------------|------------|--------------------------|------------|
| Helix score $\leq 0.5$ | 61            | 6214         | 1.28 (0.99 to 1.66) | 0.057      | 71            | 6085         | 1.56 (1.23 to 1.97) | 2.11[E-04] | 1.42 (1.20 to 1.69)      | 6.37[E-05] |
| Helix score $>0.5$     | 51            | 6224         | 1.73 (1.30 to 2.30) | 1.56[E-04] | 42            | 6114         | 1.50 (1.11 to 2.04) | 8.35[E-03] | 1.62 (1.31 to 2.01)      | 9.53[E-06] |

**Supplemental Table 12b: Odds ratios and hazard ratios for the association of rMSVs in CHEK2 with prostate cancer by Helix score**

| Category               | Carrier count | Non-carriers | OR (95% CI)         | P-value | Carrier count | Non-carriers | HR (95% CI)         | P-value    | Pooled estimate (95% CI) | P-value    |
|------------------------|---------------|--------------|---------------------|---------|---------------|--------------|---------------------|------------|--------------------------|------------|
| Helix score $\leq 0.5$ | 25            | 2537         | 1.32 (0.88 to 1.96) | 0.176   | 86            | 8079         | 1.47 (1.19 to 1.82) | 3.70[E-04] | 1.44 (1.19 to 1.74)      | 1.56[E-04] |
| Helix score $>0.5$     | 17            | 2545         | 1.53 (0.94 to 2.48) | 0.085   | 44            | 8121         | 1.32 (0.98 to 1.77) | 0.067      | 1.37 (1.07 to 1.77)      | 0.014      |

**Supplemental Table 12c: Odds ratios and hazard ratios for the association of rMSVs in CHEK2 with pancreatic cancer by Helix score**

| Category               | Carrier count | Non-carriers | OR (95% CI)          | P-value | Carrier count | Non-carriers | HR (95% CI)         | P-value | Pooled estimate (95% CI) | P-value |
|------------------------|---------------|--------------|----------------------|---------|---------------|--------------|---------------------|---------|--------------------------|---------|
| Helix score $\leq 0.5$ | 1             | 40           | 3.26 (0.45 to 23.76) | 0.243   | 6             | 878          | 0.94 (0.42 to 2.10) | 0.882   | 1.12 (0.53 to 2.36)      | 0.761   |
| Helix score $>0.5$     | 0             | 41           | 0                    |         | 4             | 880          | 1.07 (0.40 to 2.87) | 0.887   | 0.37 (0.14 to 1.00)      |         |

**Supplemental Table 12d: Odds ratios and hazard ratios for the association of rMSVs in CHEK2 with any cancer in males and females by Helix score**

| Domain                      | Carrier count | Non-carriers | OR (95% CI)         | P-value    | Carrier count | Non-carriers | HR (95% CI)         | P-value    | Pooled estimate (95% CI) | P-value    |
|-----------------------------|---------------|--------------|---------------------|------------|---------------|--------------|---------------------|------------|--------------------------|------------|
| <b>Helix score &lt;=0.5</b> | 174           | 18664        | 1.24 (1.06 to 1.44) | 7.18[E-03] | 326           | 37476        | 1.18 (1.06 to 1.32) | 2.38[E-03] | 1.20 (1.10 to 1.32)      | 1.22[E-04] |
| <b>Helix score &gt;0.5</b>  | 131           | 18707        | 1.54 (1.29 to 1.84) | 2.46[E-06] | 212           | 37590        | 1.31 (1.14 to 1.50) | 9.99[E-05] | 1.55 (1.30 to 1.84)      | 1.21[E-06] |

**Supplemental Table 12e: Odds ratios and hazard ratios for the association of rMSVs in CHEK2 with any cancer in females by Helix score**

| Domain                      | Carrier count | Non-carriers | OR (95% CI)         | P-value    | Carrier count | Non-carriers | HR (95% CI)         | P-value    | Pooled estimate (95% CI) | P-value    |
|-----------------------------|---------------|--------------|---------------------|------------|---------------|--------------|---------------------|------------|--------------------------|------------|
| <b>Helix score &lt;=0.5</b> | 112           | 11723        | 1.26 (1.04 to 1.53) | 0.021      | 152           | 17561        | 1.16 (0.99 to 1.36) | 0.075      | 1.20 (1.06 to 1.36)      | 3.72[E-03] |
| <b>Helix score &gt;0.5</b>  | 88            | 11747        | 1.60 (1.28 to 1.99) | 3.29[E-05] | 104           | 17609        | 1.30 (1.07 to 1.57) | 7.94[E-03] | 1.43 (1.23 to 1.65)      | 1.60[E-06] |

**Supplemental Table 12f: Odds ratios and hazard ratios for the association of rMSVs in CHEK2 with any cancer in males by Helix score**

| Domain                      | Carrier count | Non-carriers | OR (95% CI)         | P-value | Carrier count | Non-carriers | HR (95% CI)         | P-value    | Pooled estimate (95% CI) | P-value    |
|-----------------------------|---------------|--------------|---------------------|---------|---------------|--------------|---------------------|------------|--------------------------|------------|
| <b>Helix score &lt;=0.5</b> | 62            | 6941         | 1.20 (0.93 to 1.55) | 0.163   | 174           | 19915        | 1.22 (1.05 to 1.41) | 9.90[E-03] | 1.22 (1.06 to 1.39)      | 4.31[E-03] |
| <b>Helix score &gt;0.5</b>  | 43            | 6960         | 1.44 (1.05 to 1.96) | 0.022   | 108           | 19981        | 1.33 (1.10 to 1.60) | 3.42[E-03] | 1.35 (1.15 to 1.60)      | 3.61[E-04] |

## *Supplemental Appendix*

### *Variant calling, filtering, classification, and functional prediction*

WES data were accessed via the UK Biobank Research Analysis Platform, enabled by DNAnexus (34). WES were processed using the OQFE mapping protocol, and variants were called using DeepVariant 0.10.0, as previously described (35). Data from individual samples were then combined into one gVCF using GLnexus 1.2.6 (36). Quality Control (QC) metrics that have been previously documented were applied to VCF files (1, 2). Variants were annotated using the Ensembl Variant Effect Predictor (VEP), version 101, using the MANE Select transcript for each gene (3). Frameshift, splice acceptor, splice donor, stop gained, and start lost variants were grouped as PTVs. PTVs in the last exon were excluded, as were those in the last 50 base positions of the penultimate exon, to exclude variants likely to avoid Nonsense-Mediated mRNA Decay (4).

Participants with unknown genetic sex, genetic sex that did not match reported sex, or sex chromosome aneuploidies, were excluded from the analyses. Participants of non-European ancestry, identified either by genetic ancestry (defined using principal components analysis) (39) or self-reported ancestry, were also excluded.

To avoid complications with inclusion of closely related individuals, one of each related pair of first-degree relatives (where the kinship coefficient  $>0.17$ ) was excluded, as were participants estimated to have  $>10$  relatives up to third-degree in the cohort.

### *Combined Relative Risk Estimates*

Under the rare disease assumption, the OR and HR should both estimate the same underlying rate ratio or relative risk (RR). Thus, it is possible combine the estimates from the

retrospective and prospective analyses in meta-analysis. The equivalence of these estimates also depends on additional assumptions that there is no association between the variants and survival, and no differences in the RR by age. However, even if this is not exactly true, the meta-analysis should still provide a more powerful test of association.

Thus, for each gene, fixed effects meta-analyses of the ORs from the retrospective study, and HRs from the prospective study, were conducted using the log of each ratio and its standard error. Where there were zero carriers in cases in either the retrospective or prospective studies, a combined estimate was derived as  $(OR+OP)/(ER+EP)$ , where OR and OP are the observed number of carriers in cases in the retrospective and prospective analysis, and ER and EP are the corresponding predicted numbers of carriers, using the predict function in R applied to the logistic or Cox regression models but without carrier status. The corresponding standard error of the log(RR) estimate is then approximately  $1/\sqrt{OR+OP}$ . This method should be reasonably accurate when the (combined carrier) frequency is low, as here, since the observed counts then follow a Poisson distribution.

### *References*

1. Gardner EJ, Kentistou KA, Stankovic S, Lockhart S, Wheeler E, Day FR, et al. Damaging missense variants in IGF1R implicate a role for IGF-1 resistance in the etiology of type 2 diabetes. *Cell Genom.* 2022;2(12):None.
2. Backman JD, Li AH, Marcketta A, Sun D, Mbatchou J, Kessler MD, et al. Exome sequencing and analysis of 454,787 UK Biobank participants. *Nature.* 2021;599(7886):628-34.
3. McLaren W, Gil L, Hunt SE, Riat HS, Ritchie GR, Thormann A, et al. The Ensembl Variant Effect Predictor. *Genome Biol.* 2016;17(1):122.
4. Hu C. A population-based study of genes previously implicated in breast cancer. *N Engl J Med.* 2021;384.
5. Lau WC, Li Y, Liu Z, Gao Y, Zhang Q, Huen MS. Structure of the human dimeric ATM kinase. *Cell Cycle.* 2016;15(8):1117-24.
6. Kircher M, Witten DM, Jain P, O'Roak BJ, Cooper GM, Shendure J. A general framework for estimating the relative pathogenicity of human genetic variants. *Nat Genet.* 2014;46(3):310-5.
7. Vroling B, Heijl S. White paper: The Helix Pathogenicity Prediction Platform. arXiv preprint 2021.
8. Dorling L, Carvalho S, Allen J, Parsons MT, Fortunato C, Gonzalez-Neira A, et al. Breast cancer risks associated with missense variants in breast cancer susceptibility genes. *Genome Med.* 2022;14(1):51.
